# Supplementary material
Source: PubMed Central journal article supplement (PMC3414393)
Supplement: epi-7-729-s01.pdf [file epi-7-729-s01.pdf]

Supplementary Material to:

White WM, Brost BC, Sun Z, Rose C, Craici I, Wagner SJ, et al. Normal early pregnancy: A transient state of epigenetic change favoring hypomethylation.

Epigenetics 2012; 7(7); <http://dx.doi.org/10.4161/epi.20388>

<http://www.landesbioscience.com/journals/epigenetics/article/20388>

Supplementary Table 1: Differentially methylated genes in pregnant compared with postpartum maternal DNA listed in order of increasing FDR q value. There are 275 CpG sites in 258 genes with  $q < 0.05$ .

| SYMBOL   | Probeset ID | Mean Methyl Pregnant | Mean Methyl Postpartum | Mean methyl Diff | p-value  | q value | CHR | CPG ISLAND |
|----------|-------------|----------------------|------------------------|------------------|----------|---------|-----|------------|
| MGC39715 | cg17199658  | 0.243                | 0.288                  | -0.04            | 2.81E-07 | 0.007   | 8   | TRUE       |
| SAA2     | cg12907644  | 0.49                 | 0.55                   | -0.06            | 2.04E-06 | 0.011   | 11  | FALSE      |
| WT1      | cg13641903  | 0.466                | 0.52                   | -0.05            | 2.40E-06 | 0.011   | 11  | TRUE       |
| SPAG4    | cg23713742  | 0.464                | 0.557                  | -0.09            | 2.86E-06 | 0.011   | 20  | FALSE      |
| GNLY     | cg11752275  | 0.345                | 0.416                  | -0.07            | 2.88E-06 | 0.011   | 2   | FALSE      |
| SLC26A8  | cg15674432  | 0.095                | 0.124                  | -0.03            | 2.90E-06 | 0.011   | 6   | TRUE       |
| TREML1   | cg04454050  | 0.166                | 0.213                  | -0.05            | 2.95E-06 | 0.011   | 6   | FALSE      |
| UNC13D   | cg22467534  | 0.123                | 0.172                  | -0.05            | 4.30E-06 | 0.014   | 17  | TRUE       |
| TMEPAI   | cg00138126  | 0.526                | 0.574                  | -0.05            | 4.69E-06 | 0.014   | 20  | FALSE      |
| SPATC1   | cg12089698  | 0.21                 | 0.301                  | -0.09            | 5.65E-06 | 0.014   | 8   | TRUE       |
| INHBE    | cg22630748  | 0.518                | 0.585                  | -0.07            | 5.80E-06 | 0.014   | 12  | FALSE      |
| GSG1     | cg08399444  | 0.336                | 0.431                  | -0.09            | 7.07E-06 | 0.015   | 12  | FALSE      |
| PTPN7    | cg23506842  | 0.095                | 0.131                  | -0.04            | 7.69E-06 | 0.015   | 1   | FALSE      |
| REEP6    | cg22759185  | 0.612                | 0.655                  | -0.04            | 8.50E-06 | 0.015   | 19  | TRUE       |
| MPO      | cg04988978  | 0.187                | 0.249                  | -0.06            | 8.54E-06 | 0.015   | 17  | FALSE      |
| TREM2    | cg01980222  | 0.309                | 0.389                  | -0.08            | 9.89E-06 | 0.016   | 6   | FALSE      |
| SH3TC2   | cg01965939  | 0.25                 | 0.302                  | -0.05            | 1.23E-05 | 0.019   | 5   | FALSE      |
| DEPDC2   | cg13652336  | 0.12                 | 0.151                  | -0.03            | 1.34E-05 | 0.019   | 8   | TRUE       |
| HIPK3    | cg05501357  | 0.216                | 0.279                  | -0.06            | 1.43E-05 | 0.019   | 11  | FALSE      |
| FUT3     | cg09001777  | 0.198                | 0.267                  | -0.07            | 1.56E-05 | 0.019   | 19  | FALSE      |
| RTP3     | cg02332537  | 0.584                | 0.619                  | -0.04            | 1.80E-05 | 0.019   | 3   | FALSE      |
| PNPLA2   | cg22016649  | 0.223                | 0.286                  | -0.06            | 1.84E-05 | 0.019   | 11  | TRUE       |
| MST1     | cg12788313  | 0.399                | 0.474                  | -0.07            | 1.87E-05 | 0.019   | 3   | FALSE      |
| IL11RA   | cg21504624  | 0.303                | 0.342                  | -0.04            | 1.89E-05 | 0.019   | 9   | FALSE      |
| PPP2R4   | cg25587233  | 0.506                | 0.559                  | -0.05            | 1.91E-05 | 0.019   | 9   | FALSE      |
| LRRFIP1  | cg09037813  | 0.176                | 0.243                  | -0.07            | 1.98E-05 | 0.019   | 2   | TRUE       |
| RAB34    | cg21237418  | 0.238                | 0.316                  | -0.08            | 2.02E-05 | 0.019   | 17  | TRUE       |
| RETN     | cg22322184  | 0.407                | 0.476                  | -0.07            | 2.10E-05 | 0.019   | 19  | FALSE      |
| PRDM2    | cg25402049  | 0.608                | 0.672                  | -0.06            | 2.19E-05 | 0.019   | 1   | FALSE      |
| FCN1     | cg06244417  | 0.49                 | 0.556                  | -0.07            | 2.27E-05 | 0.019   | 9   | FALSE      |
| KLRG1    | cg00443307  | 0.4                  | 0.455                  | -0.05            | 2.29E-05 | 0.019   | 12  | FALSE      |
| S100B    | cg07685786  | 0.472                | 0.52                   | -0.05            | 2.50E-05 | 0.02    | 21  | FALSE      |
| SLC22A18 | cg19906550  | 0.288                | 0.365                  | -0.08            | 2.63E-05 | 0.02    | 11  | FALSE      |
| SOD3     | cg10307548  | 0.285                | 0.356                  | -0.07            | 2.74E-05 | 0.02    | 4   | FALSE      |
| UNQ473   | cg15937958  | 0.614                | 0.694                  | -0.08            | 2.74E-05 | 0.02    | 19  | FALSE      |
| BTN2A1   | cg07671208  | 0.582                | 0.628                  | -0.05            | 2.90E-05 | 0.021   | 6   | FALSE      |
| DEFA4    | cg19304352  | 0.76                 | 0.792                  | -0.03            | 3.03E-05 | 0.021   | 8   | FALSE      |
| TRIM21   | cg09983885  | 0.273                | 0.309                  | -0.04            | 3.23E-05 | 0.022   | 11  | TRUE       |
| ECRG4    | cg11024597  | 0.28                 | 0.378                  | -0.1             | 3.47E-05 | 0.023   | 2   | FALSE      |

|          |            |       |       |       |          |       |    |       |
|----------|------------|-------|-------|-------|----------|-------|----|-------|
| TCN1     | cg20018806 | 0.538 | 0.607 | -0.07 | 3.53E-05 | 0.023 | 11 | FALSE |
| KCNQ1    | cg16465939 | 0.173 | 0.224 | -0.05 | 3.60E-05 | 0.023 | 11 | TRUE  |
| FCGRT    | cg15528736 | 0.289 | 0.365 | -0.08 | 3.73E-05 | 0.023 | 19 | TRUE  |
| CLEC9A   | cg20098659 | 0.542 | 0.63  | -0.09 | 3.77E-05 | 0.023 | 12 | TRUE  |
| HIPK3    | cg25600606 | 0.404 | 0.504 | -0.1  | 3.93E-05 | 0.023 | 11 | FALSE |
| CHI3L1   | cg07423149 | 0.459 | 0.521 | -0.06 | 3.97E-05 | 0.023 | 1  | FALSE |
| KCNQ1    | cg12949760 | 0.361 | 0.448 | -0.09 | 4.06E-05 | 0.023 | 11 | TRUE  |
| SAA1     | cg15484375 | 0.429 | 0.495 | -0.07 | 4.21E-05 | 0.023 | 11 | FALSE |
| CIAS1    | cg26112639 | 0.171 | 0.222 | -0.05 | 4.35E-05 | 0.024 | 1  | FALSE |
| SERPINF1 | cg22242539 | 0.344 | 0.435 | -0.09 | 4.42E-05 | 0.024 | 17 | TRUE  |
| RPS6KA1  | cg01031251 | 0.496 | 0.565 | -0.07 | 4.56E-05 | 0.024 | 1  | TRUE  |
| CRHBP    | cg16545105 | 0.294 | 0.345 | -0.05 | 4.67E-05 | 0.024 | 5  | FALSE |
| LEP      | cg19594666 | 0.452 | 0.552 | -0.1  | 5.11E-05 | 0.025 | 7  | TRUE  |
| FGD4     | cg05681757 | 0.311 | 0.409 | -0.1  | 5.24E-05 | 0.025 | 12 | FALSE |
| CHI3L1   | cg03625911 | 0.344 | 0.402 | -0.06 | 5.32E-05 | 0.025 | 1  | FALSE |
| CORO2B   | cg08290628 | 0.507 | 0.55  | -0.04 | 5.55E-05 | 0.025 | 15 | FALSE |
| FMOD     | cg03764585 | 0.302 | 0.337 | -0.04 | 5.75E-05 | 0.025 | 1  | FALSE |
| SLC2A13  | cg01603095 | 0.503 | 0.538 | -0.04 | 5.97E-05 | 0.025 | 12 | TRUE  |
| CTGLF1   | cg13555884 | 0.788 | 0.824 | -0.04 | 6.40E-05 | 0.025 | 10 | FALSE |
| NDUFS2   | cg17166812 | 0.267 | 0.333 | -0.07 | 6.46E-05 | 0.025 | 1  | FALSE |
| GSTP1    | cg22224704 | 0.272 | 0.34  | -0.07 | 6.55E-05 | 0.025 | 11 | TRUE  |
| LGALS7   | cg13588835 | 0.354 | 0.408 | -0.05 | 6.58E-05 | 0.025 | 19 | FALSE |
| LTBR     | cg15784615 | 0.43  | 0.5   | -0.07 | 6.67E-05 | 0.025 | 12 | FALSE |
| HCA112   | cg26385222 | 0.467 | 0.528 | -0.06 | 6.68E-05 | 0.025 | 7  | TRUE  |
| CBFA2T3  | cg13745346 | 0.338 | 0.394 | -0.06 | 6.70E-05 | 0.025 | 16 | TRUE  |
| GP1BA    | cg11340260 | 0.456 | 0.498 | -0.04 | 6.71E-05 | 0.025 | 17 | FALSE |
| CTSG     | cg24355048 | 0.369 | 0.431 | -0.06 | 6.80E-05 | 0.025 | 14 | FALSE |
| HP       | cg06172871 | 0.319 | 0.401 | -0.08 | 6.85E-05 | 0.025 | 16 | FALSE |
| SLC11A1  | cg18854666 | 0.616 | 0.672 | -0.06 | 6.87E-05 | 0.025 | 2  | FALSE |
| GPR21    | cg04784315 | 0.31  | 0.386 | -0.08 | 7.00E-05 | 0.025 | 9  | FALSE |
| CDH5     | cg08872742 | 0.336 | 0.373 | -0.04 | 7.07E-05 | 0.025 | 16 | FALSE |
| FLJ30046 | cg08504583 | 0.497 | 0.58  | -0.08 | 7.07E-05 | 0.025 | 13 | FALSE |
| SYDE1    | cg00666746 | 0.242 | 0.284 | -0.04 | 7.10E-05 | 0.025 | 19 | TRUE  |
| SERPINA1 | cg24621042 | 0.39  | 0.464 | -0.07 | 7.10E-05 | 0.025 | 14 | FALSE |
| AER61    | cg14870461 | 0.111 | 0.152 | -0.04 | 7.19E-05 | 0.025 | 3  | TRUE  |
| PCDH12   | cg12845808 | 0.378 | 0.442 | -0.06 | 7.24E-05 | 0.025 | 5  | FALSE |
| PGBD3    | cg08335125 | 0.623 | 0.678 | -0.06 | 7.31E-05 | 0.025 | 10 | FALSE |
| FYB      | cg13703437 | 0.32  | 0.394 | -0.07 | 7.36E-05 | 0.025 | 5  | FALSE |
| HTR2A    | cg00308665 | 0.477 | 0.533 | -0.06 | 7.68E-05 | 0.026 | 13 | FALSE |
| C10orf91 | cg22045288 | 0.276 | 0.354 | -0.08 | 7.84E-05 | 0.026 | 10 | FALSE |
| H2BFS    | cg15536230 | 0.4   | 0.469 | -0.07 | 7.94E-05 | 0.026 | 21 | TRUE  |
| B3GALT7  | cg20557104 | 0.083 | 0.11  | -0.03 | 8.19E-05 | 0.026 | 19 | FALSE |
| RLN2     | cg02875297 | 0.247 | 0.278 | -0.03 | 8.41E-05 | 0.026 | 9  | TRUE  |
| ZNF259   | cg20570279 | 0.135 | 0.158 | -0.02 | 8.44E-05 | 0.026 | 11 | TRUE  |
| CCL8     | cg01636591 | 0.501 | 0.56  | -0.06 | 8.51E-05 | 0.026 | 17 | FALSE |
| CCL26    | cg05556717 | 0.27  | 0.321 | -0.05 | 8.72E-05 | 0.027 | 7  | FALSE |
| PTEN     | cg21480743 | 0.134 | 0.177 | -0.04 | 8.88E-05 | 0.027 | 10 | TRUE  |
| STK24    | cg10057295 | 0.197 | 0.263 | -0.07 | 9.05E-05 | 0.027 | 13 | TRUE  |
| OSCAR    | cg14511156 | 0.179 | 0.245 | -0.07 | 9.23E-05 | 0.027 | 19 | FALSE |
| GPLD1    | cg14023451 | 0.51  | 0.569 | -0.06 | 9.85E-05 | 0.028 | 6  | FALSE |

|          |            |       |       |       |          |       |    |       |
|----------|------------|-------|-------|-------|----------|-------|----|-------|
| POR      | cg20748065 | 0.255 | 0.345 | -0.09 | 9.86E-05 | 0.028 | 7  | TRUE  |
| KLRG1    | cg14913610 | 0.186 | 0.244 | -0.06 | 9.89E-05 | 0.028 | 12 | FALSE |
| BMX      | cg22745747 | 0.497 | 0.568 | -0.07 | 0.0001   | 0.028 | X  | TRUE  |
| FAM57A   | cg10981541 | 0.08  | 0.102 | -0.02 | 0.000103 | 0.029 | 17 | TRUE  |
| CD72     | cg12971694 | 0.21  | 0.285 | -0.08 | 0.000104 | 0.029 | 9  | FALSE |
| CD244    | cg11939496 | 0.373 | 0.454 | -0.08 | 0.000106 | 0.029 | 1  | FALSE |
| IER2     | cg17753124 | 0.418 | 0.487 | -0.07 | 0.00011  | 0.03  | 19 | FALSE |
| FUT7     | cg09305224 | 0.385 | 0.454 | -0.07 | 0.000113 | 0.03  | 9  | FALSE |
| SCNN1D   | cg22421766 | 0.159 | 0.196 | -0.04 | 0.000113 | 0.03  | 1  | FALSE |
| SRRM2    | cg06736444 | 0.814 | 0.779 | 0.035 | 0.000113 | 0.03  | 16 | TRUE  |
| PITPNM2  | cg08176694 | 0.259 | 0.317 | -0.06 | 0.000115 | 0.03  | 12 | TRUE  |
| NCF1     | cg02537023 | 0.424 | 0.462 | -0.04 | 0.000119 | 0.03  | 7  | FALSE |
| SLC26A8  | cg23807646 | 0.589 | 0.635 | -0.05 | 0.00012  | 0.03  | 6  | FALSE |
| CLCN1    | cg17922226 | 0.658 | 0.702 | -0.04 | 0.000123 | 0.031 | 7  | FALSE |
| CCDC19   | cg02849695 | 0.438 | 0.502 | -0.06 | 0.000127 | 0.032 | 1  | TRUE  |
| C10orf89 | cg09419900 | 0.344 | 0.39  | -0.05 | 0.000132 | 0.032 | 10 | FALSE |
| GATAD2B  | cg01402255 | 0.246 | 0.313 | -0.07 | 0.000132 | 0.032 | 1  | FALSE |
| UAP1L1   | cg04582938 | 0.223 | 0.257 | -0.03 | 0.000133 | 0.032 | 9  | TRUE  |
| SGK2     | cg21685427 | 0.475 | 0.548 | -0.07 | 0.000136 | 0.032 | 20 | FALSE |
| STARD6   | cg18934187 | 0.382 | 0.442 | -0.06 | 0.000137 | 0.032 | 18 | FALSE |
| SP6      | cg23355492 | 0.612 | 0.671 | -0.06 | 0.000137 | 0.032 | 17 | FALSE |
| PAQR7    | cg15662251 | 0.328 | 0.379 | -0.05 | 0.000139 | 0.032 | 1  | FALSE |
| GRB10    | cg25915982 | 0.832 | 0.801 | 0.032 | 0.00014  | 0.032 | 7  | TRUE  |
| LOC55908 | cg05718253 | 0.767 | 0.807 | -0.04 | 0.000142 | 0.032 | 19 | FALSE |
| PRTN3    | cg00615241 | 0.302 | 0.365 | -0.06 | 0.000143 | 0.032 | 19 | FALSE |
| C10orf26 | cg15227982 | 0.191 | 0.228 | -0.04 | 0.000145 | 0.032 | 10 | FALSE |
| RALGDS   | cg16872071 | 0.16  | 0.215 | -0.05 | 0.000146 | 0.032 | 9  | FALSE |
| HPR      | cg09584711 | 0.387 | 0.458 | -0.07 | 0.000146 | 0.032 | 16 | FALSE |
| ESM1     | cg20451680 | 0.51  | 0.555 | -0.05 | 0.000147 | 0.032 | 5  | TRUE  |
| GLT1D1   | cg16717225 | 0.431 | 0.476 | -0.04 | 0.000147 | 0.032 | 12 | TRUE  |
| DEFB1    | cg24292612 | 0.292 | 0.377 | -0.09 | 0.000147 | 0.032 | 8  | FALSE |
| ITGB1BP1 | cg26306976 | 0.423 | 0.515 | -0.09 | 0.00015  | 0.032 | 2  | FALSE |
| SLC22A18 | cg21019522 | 0.224 | 0.295 | -0.07 | 0.000155 | 0.033 | 11 | FALSE |
| C19orf35 | cg01129847 | 0.18  | 0.243 | -0.06 | 0.000156 | 0.033 | 19 | FALSE |
| KRT6A    | cg11471401 | 0.516 | 0.576 | -0.06 | 0.000158 | 0.033 | 12 | FALSE |
| FUT7     | cg02679745 | 0.234 | 0.319 | -0.09 | 0.000161 | 0.033 | 9  | FALSE |
| GPR97    | cg12125117 | 0.244 | 0.305 | -0.06 | 0.000163 | 0.034 | 16 | FALSE |
| URP2     | cg14654385 | 0.255 | 0.356 | -0.1  | 0.000171 | 0.034 | 11 | TRUE  |
| JAK3     | cg18145683 | 0.606 | 0.654 | -0.05 | 0.000171 | 0.034 | 19 | TRUE  |
| NOTCH4   | cg14700707 | 0.173 | 0.23  | -0.06 | 0.000172 | 0.034 | 6  | FALSE |
| TNF      | cg04425624 | 0.11  | 0.15  | -0.04 | 0.000172 | 0.034 | 6  | FALSE |
| TRSPAP1  | cg13857440 | 0.114 | 0.146 | -0.03 | 0.000176 | 0.034 | 1  | TRUE  |
| GUCY1B2  | cg24821554 | 0.292 | 0.384 | -0.09 | 0.000176 | 0.034 | 13 | FALSE |
| CTSG     | cg24777950 | 0.253 | 0.333 | -0.08 | 0.000177 | 0.034 | 14 | FALSE |
| F2RL2    | cg00415993 | 0.276 | 0.354 | -0.08 | 0.000179 | 0.035 | 5  | FALSE |
| SFTPD    | cg03600318 | 0.224 | 0.279 | -0.05 | 0.000182 | 0.035 | 10 | FALSE |
| LGP1     | cg13053608 | 0.239 | 0.318 | -0.08 | 0.000182 | 0.035 | 17 | FALSE |
| GPR18    | cg03404502 | 0.442 | 0.514 | -0.07 | 0.000183 | 0.035 | 13 | FALSE |
| CASP10   | cg16745604 | 0.213 | 0.269 | -0.06 | 0.000186 | 0.035 | 2  | FALSE |
| FLJ35530 | cg19399532 | 0.215 | 0.292 | -0.08 | 0.000188 | 0.035 | 1  | TRUE  |

|           |            |       |       |       |          |       |    |       |
|-----------|------------|-------|-------|-------|----------|-------|----|-------|
| PMAIP1    | cg22549408 | 0.371 | 0.427 | -0.06 | 0.000189 | 0.035 | 18 | TRUE  |
| EHF       | cg13084525 | 0.43  | 0.47  | -0.04 | 0.000191 | 0.035 | 11 | FALSE |
| LHFPL2    | cg06759890 | 0.232 | 0.292 | -0.06 | 0.000191 | 0.035 | 5  | FALSE |
| GLYCTK    | cg17386185 | 0.124 | 0.159 | -0.04 | 0.000193 | 0.035 | 3  | TRUE  |
| AZU1      | cg17823175 | 0.525 | 0.595 | -0.07 | 0.000197 | 0.035 | 19 | TRUE  |
| NR2E1     | cg03958979 | 0.191 | 0.218 | -0.03 | 0.000199 | 0.035 | 6  | TRUE  |
| APOBEC3G  | cg04286933 | 0.1   | 0.134 | -0.03 | 0.0002   | 0.035 | 22 | FALSE |
| CAB39L    | cg17777592 | 0.322 | 0.376 | -0.05 | 0.000202 | 0.036 | 13 | FALSE |
| IFITM3    | cg14885742 | 0.302 | 0.372 | -0.07 | 0.000206 | 0.036 | 11 | TRUE  |
| AQP10     | cg20713492 | 0.149 | 0.189 | -0.04 | 0.000209 | 0.036 | 1  | FALSE |
| CST7      | cg09971811 | 0.245 | 0.3   | -0.06 | 0.000209 | 0.036 | 20 | FALSE |
| SLPI      | cg23889010 | 0.343 | 0.413 | -0.07 | 0.000211 | 0.036 | 20 | FALSE |
| PTPN18    | cg26160573 | 0.141 | 0.183 | -0.04 | 0.000212 | 0.036 | 2  | TRUE  |
| MCAM      | cg21096399 | 0.209 | 0.252 | -0.04 | 0.000213 | 0.036 | 11 | TRUE  |
| PTAFR     | cg24354652 | 0.336 | 0.392 | -0.06 | 0.000213 | 0.036 | 1  | FALSE |
| PRF1      | cg02374486 | 0.742 | 0.692 | 0.051 | 0.000214 | 0.036 | 10 | FALSE |
| CD248     | cg00350296 | 0.147 | 0.189 | -0.04 | 0.00022  | 0.036 | 11 | FALSE |
| HK2       | cg18638581 | 0.216 | 0.293 | -0.08 | 0.000222 | 0.036 | 2  | FALSE |
| MPG       | cg16003913 | 0.26  | 0.319 | -0.06 | 0.000222 | 0.036 | 16 | FALSE |
| FAM65A    | cg04925864 | 0.11  | 0.134 | -0.02 | 0.000225 | 0.036 | 16 | TRUE  |
| RNASE2    | cg26191951 | 0.26  | 0.32  | -0.06 | 0.000226 | 0.036 | 14 | FALSE |
| IL27      | cg17122311 | 0.445 | 0.518 | -0.07 | 0.000228 | 0.036 | 16 | FALSE |
| DEFA1     | cg10758292 | 0.398 | 0.49  | -0.09 | 0.000229 | 0.036 | 8  | FALSE |
| CSF3R     | cg07285167 | 0.28  | 0.372 | -0.09 | 0.000229 | 0.036 | 1  | FALSE |
| FAM83F    | cg03954858 | 0.471 | 0.517 | -0.05 | 0.000231 | 0.036 | 22 | FALSE |
| PRPH      | cg24059075 | 0.222 | 0.259 | -0.04 | 0.000232 | 0.036 | 12 | FALSE |
| RAB36     | cg15379633 | 0.21  | 0.267 | -0.06 | 0.000234 | 0.036 | 22 | TRUE  |
| HLA-DRA   | cg25764570 | 0.505 | 0.575 | -0.07 | 0.000239 | 0.036 | 6  | FALSE |
| LTBP3     | cg08965235 | 0.143 | 0.189 | -0.05 | 0.00024  | 0.036 | 11 | TRUE  |
| SEPT6     | cg09581098 | 0.31  | 0.268 | 0.042 | 0.000241 | 0.036 | X  | TRUE  |
| SCGB3A1   | cg14472601 | 0.528 | 0.573 | -0.04 | 0.000241 | 0.036 | 5  | TRUE  |
| C16orf50  | cg01813965 | 0.215 | 0.279 | -0.06 | 0.000241 | 0.036 | 16 | FALSE |
| ABP1      | cg07897701 | 0.37  | 0.43  | -0.06 | 0.000243 | 0.036 | 7  | FALSE |
| CSNK1E    | cg01441777 | 0.429 | 0.501 | -0.07 | 0.000245 | 0.036 | 22 | TRUE  |
| LMO2      | cg09358725 | 0.32  | 0.394 | -0.07 | 0.000247 | 0.036 | 11 | FALSE |
| SPI1      | cg14088811 | 0.275 | 0.351 | -0.08 | 0.00025  | 0.036 | 11 | TRUE  |
| SFTPD     | cg08458487 | 0.267 | 0.358 | -0.09 | 0.00025  | 0.036 | 10 | FALSE |
| GNGT2     | cg17839611 | 0.681 | 0.614 | 0.067 | 0.000255 | 0.037 | 17 | FALSE |
| MRGPRF    | cg22933847 | 0.188 | 0.237 | -0.05 | 0.000256 | 0.037 | 11 | FALSE |
| FXD1      | cg27461196 | 0.494 | 0.572 | -0.08 | 0.000256 | 0.037 | 19 | FALSE |
| ROBO4     | cg10148841 | 0.47  | 0.533 | -0.06 | 0.000259 | 0.037 | 11 | FALSE |
| LY9       | cg18920397 | 0.642 | 0.56  | 0.082 | 0.000262 | 0.037 | 1  | FALSE |
| AIF1      | cg24211388 | 0.288 | 0.379 | -0.09 | 0.000263 | 0.037 | 6  | FALSE |
| C5orf4    | cg10257049 | 0.162 | 0.217 | -0.05 | 0.000267 | 0.037 | 5  | FALSE |
| CTNND1    | cg17995823 | 0.21  | 0.275 | -0.07 | 0.000271 | 0.038 | 11 | FALSE |
| LST1      | cg23509869 | 0.295 | 0.343 | -0.05 | 0.000275 | 0.038 | 6  | FALSE |
| C17orf44  | cg06319579 | 0.256 | 0.286 | -0.03 | 0.000278 | 0.038 | 17 | FALSE |
| LOC284837 | cg00546897 | 0.448 | 0.537 | -0.09 | 0.000279 | 0.038 | 21 | FALSE |
| NR1H3     | cg12613344 | 0.576 | 0.638 | -0.06 | 0.00028  | 0.038 | 11 | FALSE |
| HYAL2     | cg00840516 | 0.493 | 0.545 | -0.05 | 0.000283 | 0.038 | 3  | FALSE |

|            |            |       |       |       |          |       |    |       |
|------------|------------|-------|-------|-------|----------|-------|----|-------|
| MPO        | cg09421562 | 0.457 | 0.512 | -0.05 | 0.000287 | 0.038 | 17 | FALSE |
| APITD1     | cg09242541 | 0.408 | 0.454 | -0.05 | 0.000288 | 0.038 | 1  | FALSE |
| SLC34A2    | cg21200703 | 0.268 | 0.293 | -0.03 | 0.000295 | 0.039 | 4  | TRUE  |
| HCN1       | cg06498267 | 0.114 | 0.137 | -0.02 | 0.000296 | 0.039 | 5  | TRUE  |
| LYPD3      | cg15014458 | 0.449 | 0.491 | -0.04 | 0.000302 | 0.04  | 19 | FALSE |
| HYAL2      | cg27091787 | 0.38  | 0.437 | -0.06 | 0.000305 | 0.04  | 3  | FALSE |
| MYO1F      | cg16504798 | 0.483 | 0.53  | -0.05 | 0.000308 | 0.04  | 19 | FALSE |
| GZMM       | cg18338021 | 0.86  | 0.818 | 0.042 | 0.000312 | 0.04  | 19 | TRUE  |
| IGLL1      | cg10494770 | 0.375 | 0.415 | -0.04 | 0.000315 | 0.04  | 22 | FALSE |
| CLIC1      | cg01578324 | 0.182 | 0.22  | -0.04 | 0.000323 | 0.041 | 6  | FALSE |
| MFAP4      | cg13030582 | 0.204 | 0.257 | -0.05 | 0.000323 | 0.041 | 17 | FALSE |
| ITGB2      | cg04790129 | 0.265 | 0.318 | -0.05 | 0.000329 | 0.041 | 21 | FALSE |
| BCL2       | cg25059899 | 0.621 | 0.678 | -0.06 | 0.00033  | 0.041 | 18 | TRUE  |
| LAIR1      | cg20320468 | 0.49  | 0.561 | -0.07 | 0.000334 | 0.041 | 19 | FALSE |
| CIDEB      | cg13840968 | 0.5   | 0.542 | -0.04 | 0.000338 | 0.041 | 14 | TRUE  |
| ATP6V1E2   | cg27485921 | 0.24  | 0.317 | -0.08 | 0.000339 | 0.041 | 2  | FALSE |
| SIGLEC9    | cg04164824 | 0.272 | 0.335 | -0.06 | 0.000339 | 0.041 | 19 | FALSE |
| DHCR7      | cg10763288 | 0.281 | 0.319 | -0.04 | 0.00034  | 0.041 | 11 | TRUE  |
| ELA2       | cg07239938 | 0.334 | 0.408 | -0.07 | 0.000341 | 0.041 | 19 | TRUE  |
| PDZK3      | cg22705225 | 0.234 | 0.259 | -0.03 | 0.000342 | 0.041 | 5  | TRUE  |
| DOK3       | cg02357714 | 0.139 | 0.181 | -0.04 | 0.000342 | 0.041 | 5  | FALSE |
| CD3G       | cg15880738 | 0.731 | 0.66  | 0.071 | 0.000345 | 0.042 | 11 | FALSE |
| SPAG4L     | cg08642068 | 0.356 | 0.437 | -0.08 | 0.000349 | 0.042 | 20 | FALSE |
| VTN        | cg21846903 | 0.22  | 0.291 | -0.07 | 0.00035  | 0.042 | 17 | FALSE |
| P518       | cg03924115 | 0.291 | 0.353 | -0.06 | 0.000354 | 0.042 | 9  | TRUE  |
| FCGR1A     | cg19464944 | 0.198 | 0.255 | -0.06 | 0.000359 | 0.042 | 1  | FALSE |
| ZNF690     | cg21033855 | 0.1   | 0.124 | -0.02 | 0.000359 | 0.042 | 15 | TRUE  |
| IL27       | cg25341726 | 0.289 | 0.348 | -0.06 | 0.000364 | 0.043 | 16 | FALSE |
| NRXN1      | cg10917619 | 0.521 | 0.561 | -0.04 | 0.000367 | 0.043 | 2  | TRUE  |
| CYGB       | cg21301440 | 0.151 | 0.182 | -0.03 | 0.00037  | 0.043 | 17 | TRUE  |
| NCF4       | cg09624565 | 0.199 | 0.256 | -0.06 | 0.000375 | 0.043 | 22 | FALSE |
| DGKZ       | cg18765542 | 0.169 | 0.203 | -0.03 | 0.000379 | 0.044 | 11 | TRUE  |
| CRYBB1     | cg04541607 | 0.218 | 0.27  | -0.05 | 0.000382 | 0.044 | 22 | FALSE |
| SLC25A10   | cg07845392 | 0.33  | 0.379 | -0.05 | 0.000387 | 0.044 | 17 | TRUE  |
| TNFRSF7    | cg06495803 | 0.461 | 0.418 | 0.042 | 0.000387 | 0.044 | 12 | FALSE |
| K6IRS2     | cg20050826 | 0.278 | 0.353 | -0.07 | 0.000391 | 0.044 | 12 | TRUE  |
| CCIN       | cg15248035 | 0.285 | 0.389 | -0.1  | 0.000393 | 0.044 | 9  | TRUE  |
| C15orf5    | cg08130265 | 0.346 | 0.427 | -0.08 | 0.000395 | 0.044 | 15 | FALSE |
| IL1R2      | cg20340242 | 0.185 | 0.25  | -0.07 | 0.000397 | 0.044 | 2  | TRUE  |
| TRIP6      | cg01274660 | 0.177 | 0.227 | -0.05 | 0.000406 | 0.045 | 7  | FALSE |
| PRKG2      | cg16744741 | 0.42  | 0.458 | -0.04 | 0.00041  | 0.045 | 4  | FALSE |
| ST6GALNAC4 | cg25732252 | 0.431 | 0.472 | -0.04 | 0.000419 | 0.046 | 9  | FALSE |
| FLJ46380   | cg19180828 | 0.378 | 0.424 | -0.05 | 0.000421 | 0.046 | 1  | TRUE  |
| LRP3       | cg08700306 | 0.411 | 0.469 | -0.06 | 0.000425 | 0.046 | 19 | FALSE |
| CD59       | cg24453664 | 0.255 | 0.328 | -0.07 | 0.00043  | 0.046 | 11 | FALSE |
| FGF23      | cg23219570 | 0.147 | 0.192 | -0.05 | 0.00043  | 0.046 | 12 | FALSE |
| ITGAM      | cg15337006 | 0.181 | 0.24  | -0.06 | 0.000431 | 0.046 | 16 | FALSE |
| FLJ45717   | cg18354594 | 0.761 | 0.793 | -0.03 | 0.000434 | 0.046 | 1  | FALSE |
| C6orf105   | cg10787197 | 0.403 | 0.481 | -0.08 | 0.000437 | 0.046 | 6  | FALSE |

|         |            |       |       |       |          |       |    |       |
|---------|------------|-------|-------|-------|----------|-------|----|-------|
| MGAT5B  | cg07112210 | 0.389 | 0.41  | -0.02 | 0.000448 | 0.047 | 17 | FALSE |
| GFRA3   | cg20178764 | 0.319 | 0.377 | -0.06 | 0.00045  | 0.047 | 5  | TRUE  |
| POLR3D  | cg07059360 | 0.329 | 0.357 | -0.03 | 0.000452 | 0.047 | 8  | TRUE  |
| PRLHR   | cg15748507 | 0.281 | 0.308 | -0.03 | 0.000452 | 0.047 | 10 | TRUE  |
| FOXJ1   | cg24164563 | 0.169 | 0.203 | -0.03 | 0.000453 | 0.047 | 17 | TRUE  |
| SH3BP5  | cg21283680 | 0.31  | 0.393 | -0.08 | 0.000454 | 0.047 | 3  | FALSE |
| SEPT9   | cg03330678 | 0.371 | 0.458 | -0.09 | 0.00046  | 0.047 | 17 | TRUE  |
| SLCO3A1 | cg17338403 | 0.101 | 0.123 | -0.02 | 0.000463 | 0.047 | 15 | FALSE |
| UBTD1   | cg17296078 | 0.19  | 0.249 | -0.06 | 0.000463 | 0.047 | 10 | TRUE  |
| GAS2L2  | cg24922045 | 0.391 | 0.425 | -0.03 | 0.000464 | 0.047 | 17 | FALSE |
| NCOR2   | cg22820108 | 0.481 | 0.532 | -0.05 | 0.000465 | 0.047 | 12 | TRUE  |
| PCGF5   | cg17001035 | 0.117 | 0.142 | -0.03 | 0.000465 | 0.047 | 10 | TRUE  |
| CEACAM6 | cg21126943 | 0.252 | 0.332 | -0.08 | 0.000473 | 0.048 | 19 | FALSE |
| C3orf9  | cg17421623 | 0.254 | 0.289 | -0.04 | 0.000475 | 0.048 | 3  | FALSE |
| NUCB1   | cg21252483 | 0.48  | 0.51  | -0.03 | 0.000477 | 0.048 | 19 | TRUE  |
| GPR109B | cg15447486 | 0.369 | 0.448 | -0.08 | 0.00048  | 0.048 | 12 | FALSE |
| KNS2    | cg23090046 | 0.422 | 0.5   | -0.08 | 0.000481 | 0.048 | 14 | TRUE  |
| HPS4    | cg07924575 | 0.493 | 0.55  | -0.06 | 0.000487 | 0.048 | 22 | FALSE |
| S100A9  | cg03165378 | 0.471 | 0.532 | -0.06 | 0.000487 | 0.048 | 1  | FALSE |
| LGALS4  | cg06394229 | 0.46  | 0.515 | -0.05 | 0.000488 | 0.048 | 19 | FALSE |
| TFR2    | cg10681065 | 0.403 | 0.471 | -0.07 | 0.000488 | 0.048 | 7  | FALSE |
| ELA2    | cg01963696 | 0.455 | 0.522 | -0.07 | 0.000489 | 0.048 | 19 | TRUE  |
| PNPLA2  | cg24427660 | 0.392 | 0.473 | -0.08 | 0.00049  | 0.048 | 11 | TRUE  |
| TIGD5   | cg14292823 | 0.574 | 0.621 | -0.05 | 0.000495 | 0.048 | 8  | TRUE  |
| NIFIE14 | cg00739120 | 0.233 | 0.279 | -0.05 | 0.000501 | 0.048 | 19 | TRUE  |
| GRB7    | cg17740645 | 0.27  | 0.339 | -0.07 | 0.000512 | 0.049 | 17 | FALSE |
